# Supplementary material for: Improved hydrogenation function of Pt@SOD incorporated inside sulfided NiMo hydrocracking catalyst
Source: Royal Society of Chemistry journal article supplement (doi:10.1039/c5cy01243k), 2015-10-19

## Improved hydrogenation function (Pt@SOD) incorporated inside sulfided (NiMo) hydrocracking catalyst

M. G. Sibi, S. A. Farooqui, M. Anand, A. Rai, A. K. Sinha\*<sup>1</sup>

*CSIR-Indian Institute of Petroleum, Dehradun – 248005, India.*

*\*Corresponding Author. E-mail: asinha@iip.res.in, Fax: +91-135-266-203; Tel: +91-1352525842*

### Supplementary information

Table S1: Selectivity of various hydrocarbons over NiMo-Pt@SOD@ZSM-5 catalyst (at  $\geq 99\%$  jatropha oil conversion).

| Temp | H <sub>2</sub> /HC | <C <sub>8</sub> | C <sub>9</sub> -C <sub>14</sub> | C <sub>15</sub> | C <sub>16</sub> | C <sub>17</sub> | C <sub>18</sub> | C <sub>18+</sub> |
|------|--------------------|-----------------|---------------------------------|-----------------|-----------------|-----------------|-----------------|------------------|
| 380  | 500                | 3.11            | 1.59                            | 8.16            | 10.97           | 35.35           | 34.95           | 3.18             |
| 400  | 500                | 5.3             | 2.35                            | 2.78            | 9.39            | 39.35           | 34.95           | 5.82             |
| 420  | 500                | 0.37            | 3.51                            | 9.02            | 10.77           | 37.3            | 35.94           | 3.12             |
| 380  | 1000               | 7.81            | 11.77                           | 7.97            | 12.44           | 23.25           | 30.38           | 6.3              |
| 400  | 1000               | 3.68            | 3.79                            | 5.76            | 12.79           | 28.2            | 42.83           | 2.8              |
| 420  | 1000               | 7.33            | 10.22                           | 7.15            | 12.83           | 22.96           | 32.25           | 7.22             |
| 450  | 1000               | 19.07           | 26.8                            | 6.47            | 12.34           | 10.86           | 18.18           | 6.31             |
| 380  | 1500               | 3.74            | 7.09                            | 5.21            | 15.29           | 16.16           | 47.29           | 5.23             |
| 420  | 1500               | 11.88           | 17.4                            | 7.21            | 13.37           | 15.51           | 25.28           | 8.5              |
| 450  | 1500               | 27.69           | 29.4                            | 7.27            | 10.74           | 10.03           | 12.43           | 1.22             |
| 380  | 2000               | 3.65            | 5.81                            | 4.61            | 15.21           | 15.8            | 49.36           | 5.5              |
| 400  | 2000               | 7.38            | 13.96                           | 5.94            | 15.38           | 13.42           | 36.5            | 7.48             |
| 420  | 2000               | 10.19           | 18.89                           | 4.79            | 10.69           | 8.03            | 19.51           | 7.89             |
| 450  | 2000               | 21.58           | 25.36                           | 5.88            | 13.63           | 11.04           | 19.64           | 2.85             |
| 380  | 250                | 1.67            | 3.8                             | 6               | 11.8            | 31.1            | 43.8            | 1.68             |

Table S2: Composition of effluent gas

| H <sub>2</sub>     | CH <sub>4</sub> | CH <sub>3</sub> -CH <sub>3</sub> | CH <sub>2</sub> =CH <sub>2</sub> | CH <sub>3</sub> CH <sub>2</sub> CH <sub>3</sub> | CO <sub>2</sub> | CO    |
|--------------------|-----------------|----------------------------------|----------------------------------|-------------------------------------------------|-----------------|-------|
| 88.57 <sup>a</sup> | 0.69            | 0.28                             | 0.006                            | 1.23                                            | 6.74            | 2.45  |
| 93.7 <sup>b</sup>  | 0.79            | 0.32                             | 0.003                            | 1.05                                            | 2.46            | 1.192 |

a: H<sub>2</sub>/HC, 250, T: 380°C, LHSV:1, P:80, b: H<sub>2</sub>/HC, 1000, T: 420°C, LHSV:1, P:80.

Figure: S1: Geometrically optimized H<sub>2</sub> (a), SOD (b), Pt (c, 0.4 nm), Pt (d, 0.57 nm), and hydrogen adsorbed SOD (e, f)

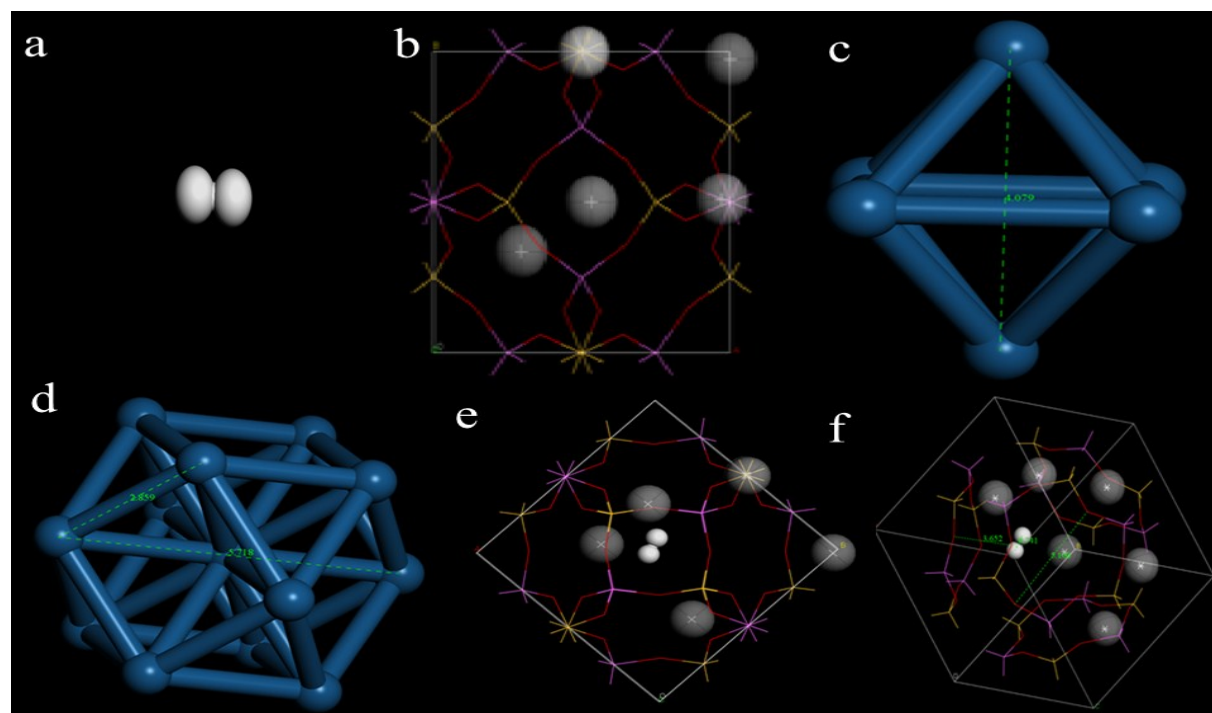

Figure:S2: Geometrically optimized Pt-SOD-H<sub>2</sub>. (a,b) Small platinum nanoparticle (0.4 nm); and (c,d) bigger platinum nanoparticle (0.57 nm).

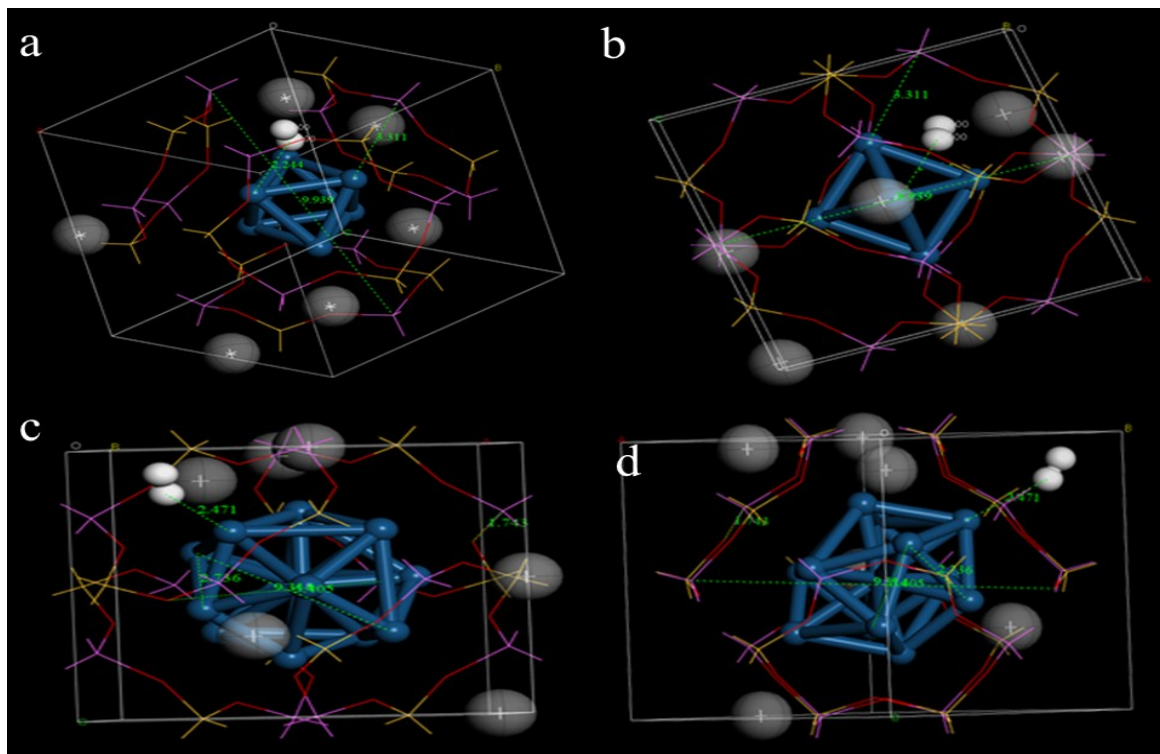

Figure: S3: Geometry optimization of Pt@SOD

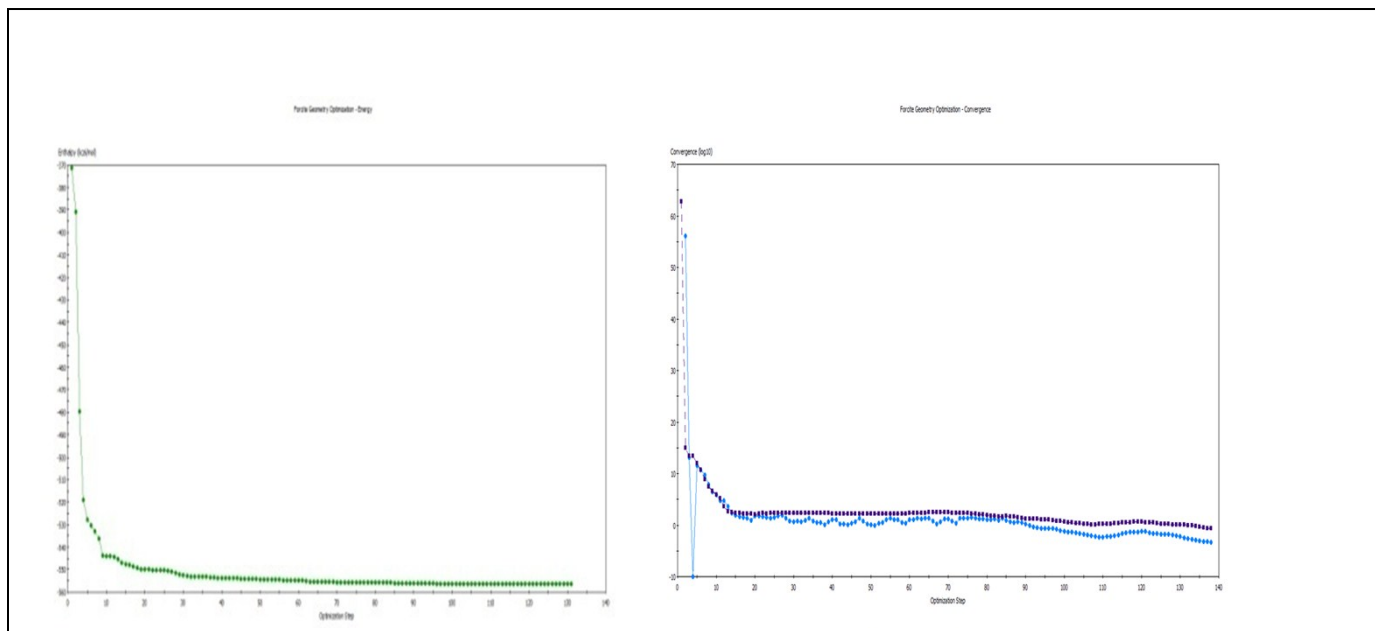

Figure S4: EDX analysis of Pt@SOD

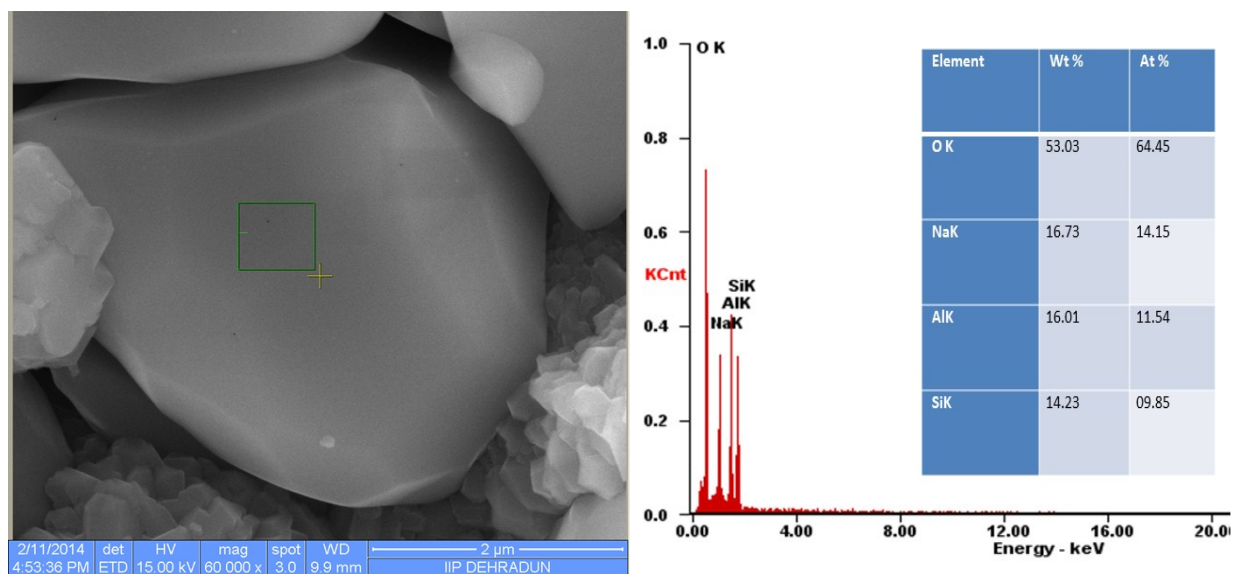

Figure S5: Influence of reaction temperature on yield of various products ( $H_2/HC$  ratio 500, P 80, GL: Gasoline, KR: Kerosene, DL: Diesel).

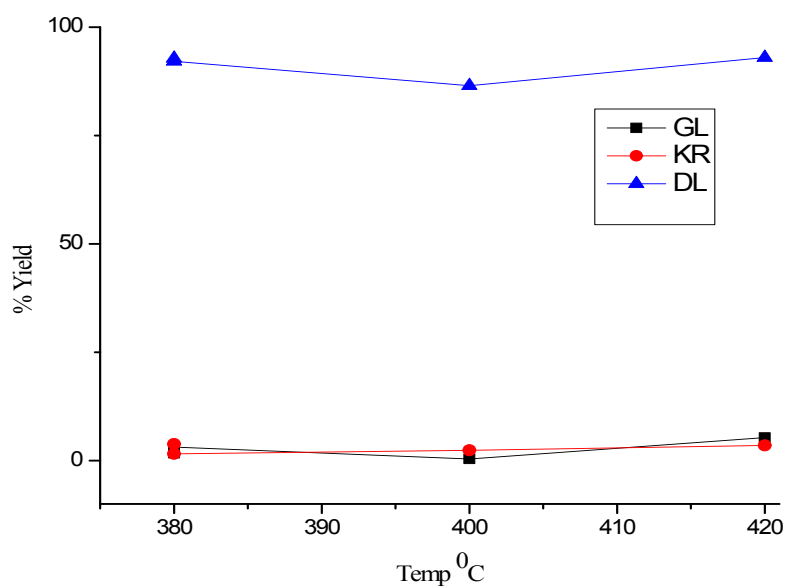

Figure S6: Influence of reaction temperature on yield of various products (  $H_2/HC$  ratio 1000, P 80, GL: Gasoline, KR: Kerosene, DL: Diesel, HVY: Oligomers).

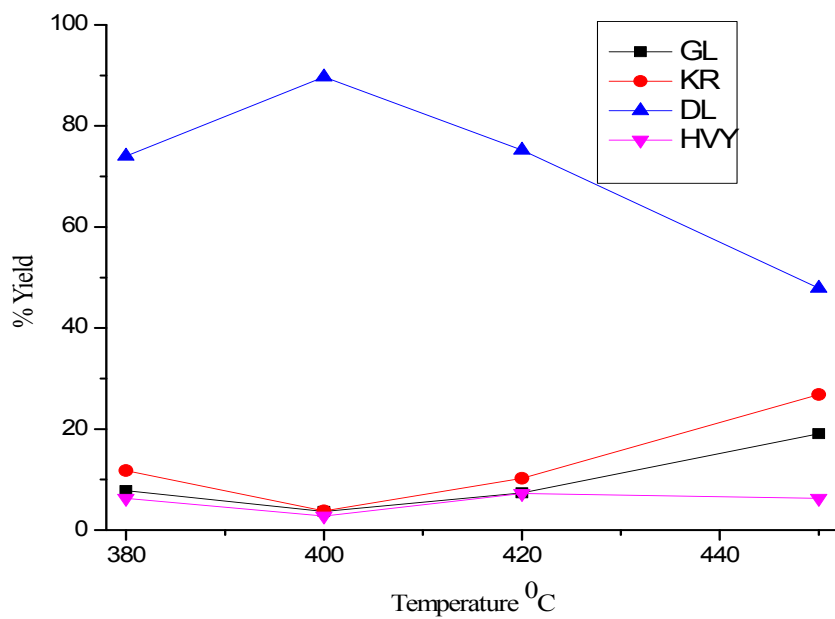

Figure S7: Influence of reaction temperature on yield of various products ( $H_2/HC$  ratio 1500, P 80 bar, GL: Gasoline, KR: Kerosene, DL: Diesel, HV: Oligomers).

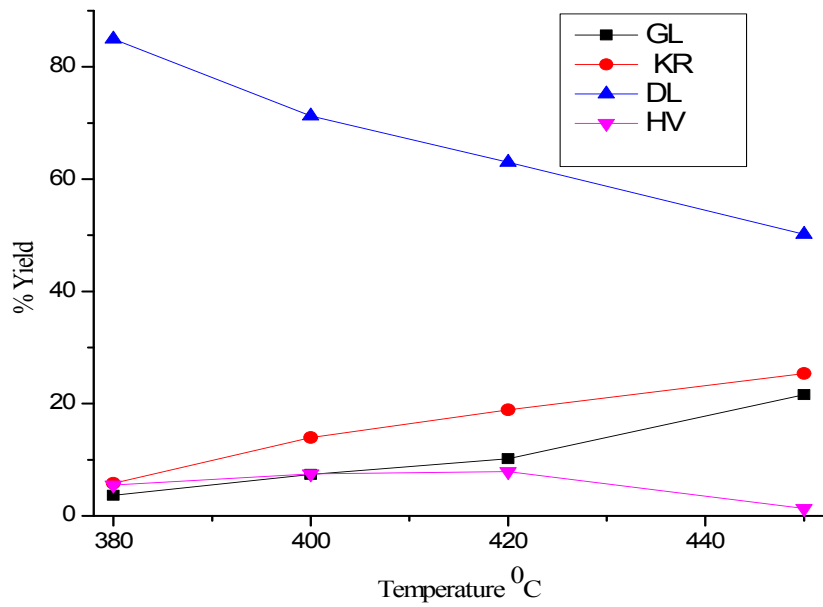

Supplement: c5cy01243k1.pdf [file c5cy01243k1.pdf]
